# Supplementary material
Source: Royal Society of Chemistry journal article supplement (doi:10.1039/d6ta03257e)
Supplement: d6ta03257e1.pdf [file d6ta03257e1.pdf]

## Supplementary Information

# **From 2D to 3D Plasmonic Periodic Heterostructures: How Plasmon Resonance Influences on Photocatalytic Degradation**

## **Section SI. Characteration of Au/Ag-TiO<sub>2</sub> Heterostructure**

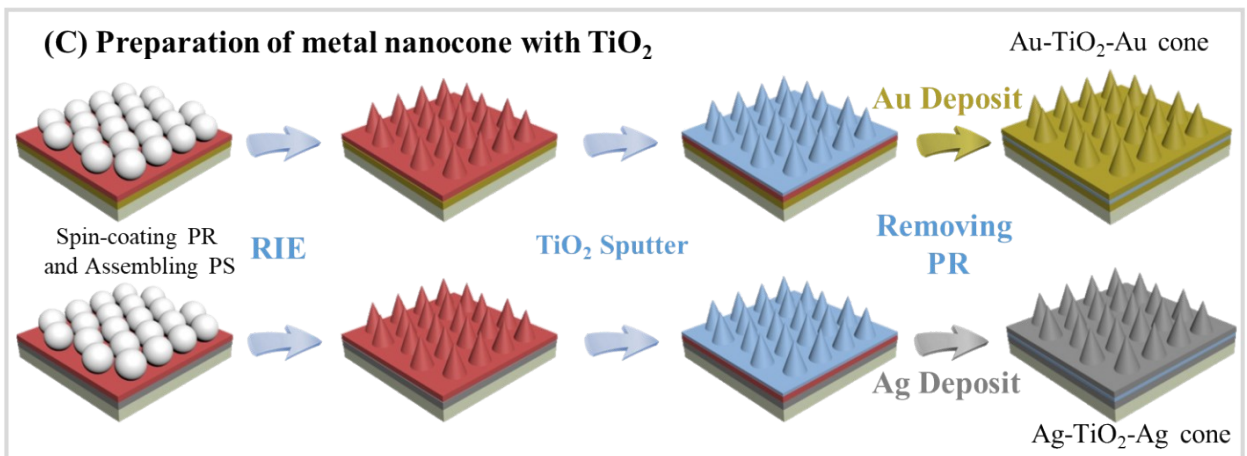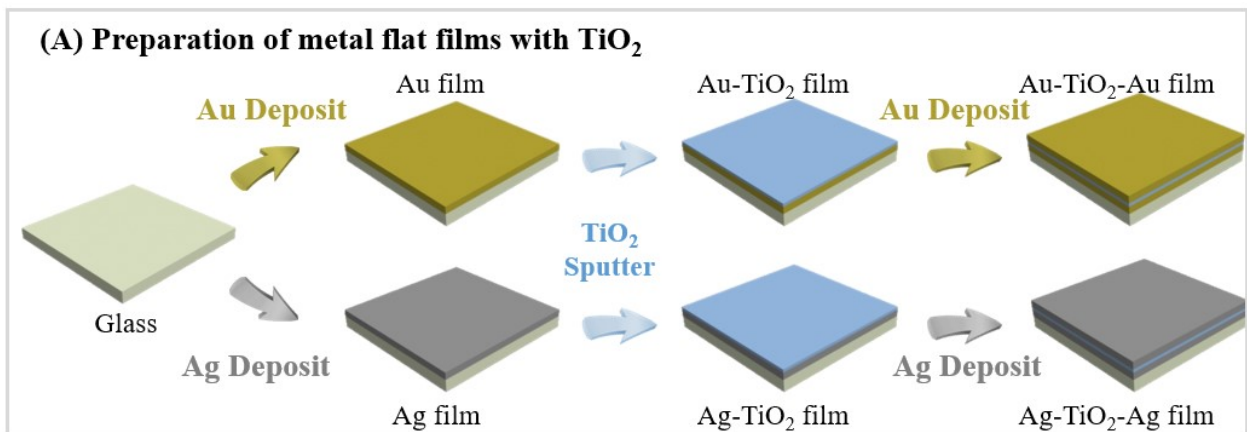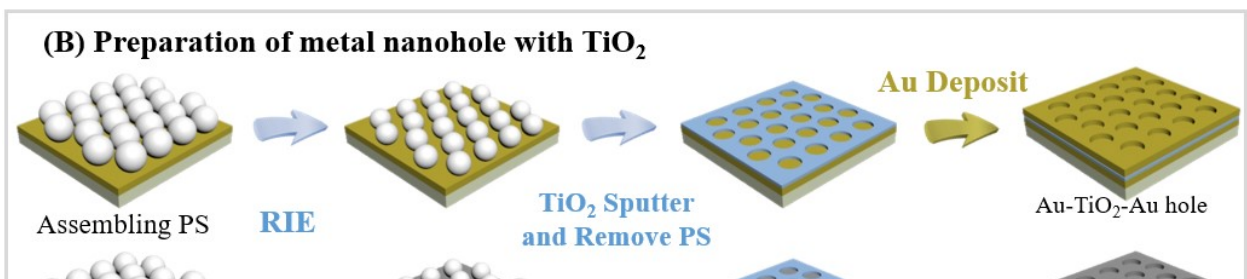

**Figure S1.** Schematic illustration of preparation of (A) Au/Ag flat films with TiO<sub>2</sub>, (B) Au/Ag nanohole with TiO<sub>2</sub>, and (C) Au/Ag nanocone with TiO<sub>2</sub>.

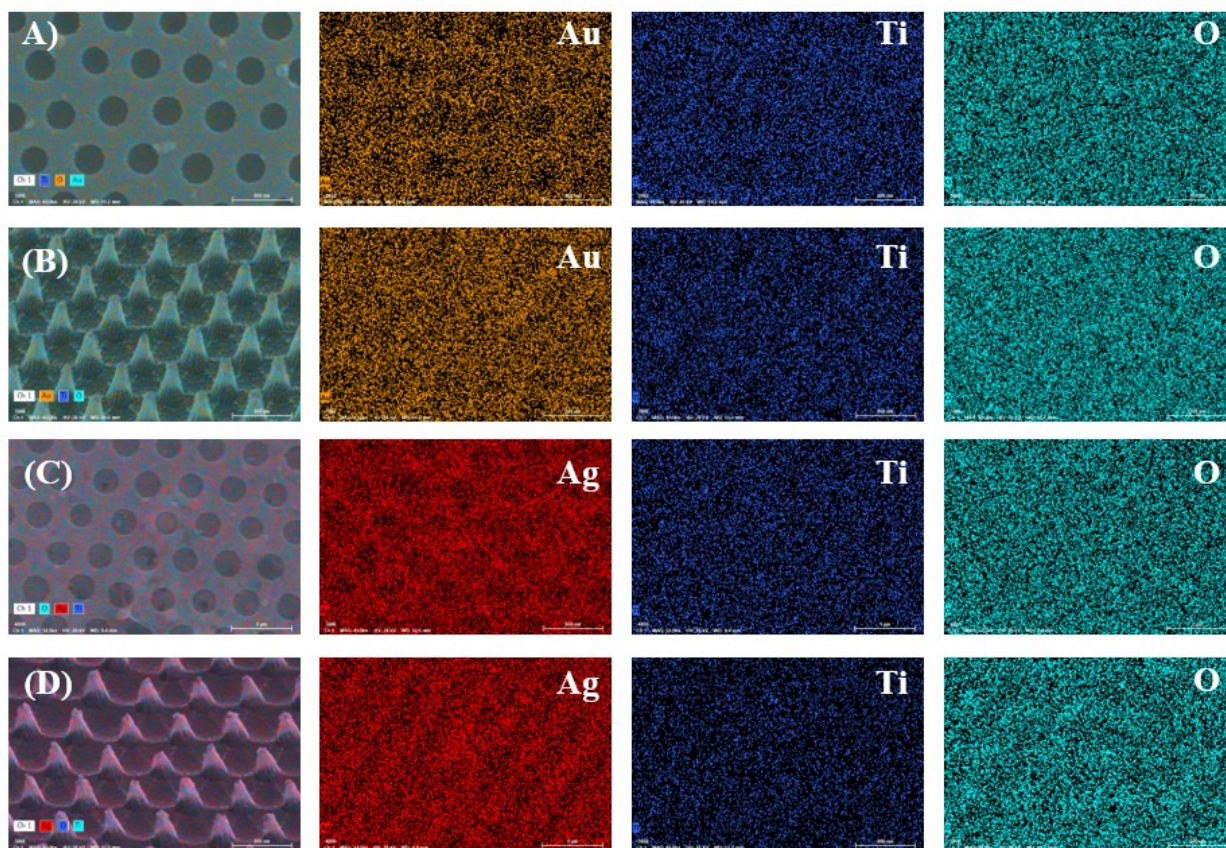

**Figure S2.** EDS pictures of (A) Au-TiO<sub>2</sub>-Au hole, (B) Au-TiO<sub>2</sub>-Au cone, (C) Ag-TiO<sub>2</sub>-Ag hole and (D) Ag-TiO<sub>2</sub>-Ag cone.

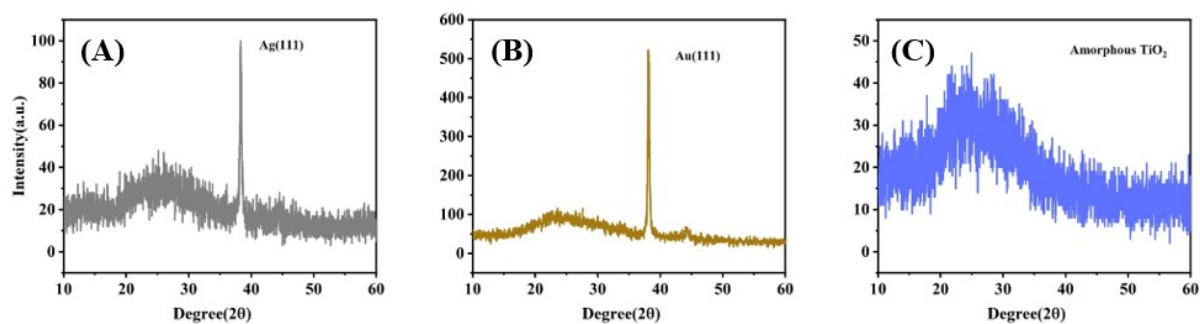

**Figure S3.** X-Ray diffraction (XRD) images of (A) Ag(111), (B) Au(111) and (C) amorphous TiO<sub>2</sub>.

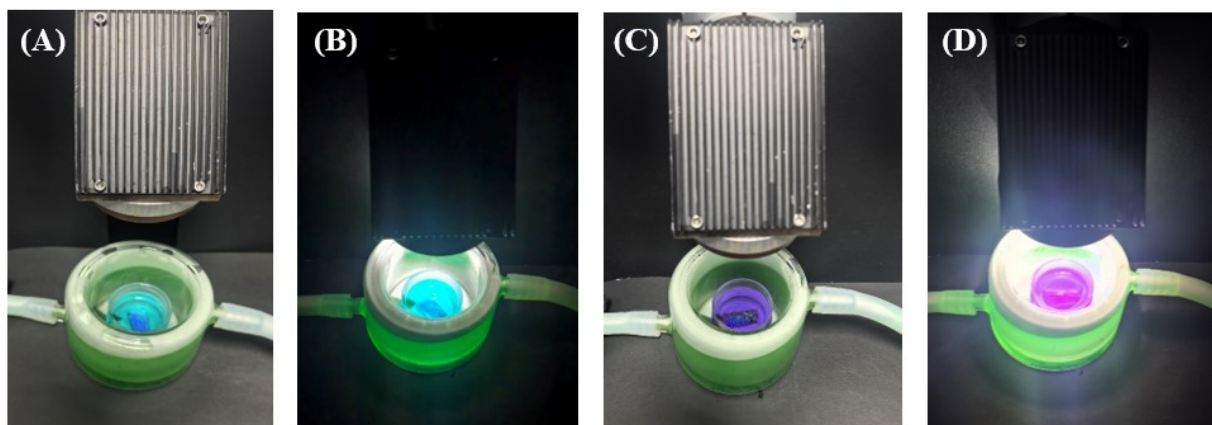

**Figure S4.** Photograph showing the degradation of organic dyes under xenon lamp irradiation with same size of (A) Ag-TiO<sub>2</sub>-Ag hole in MB with light off, (B) Ag-TiO<sub>2</sub>-Ag hole in MB with light on, (C) Au-TiO<sub>2</sub>-Au hole in CV with light off and (D) Au-TiO<sub>2</sub>-Au hole in CV with light on.

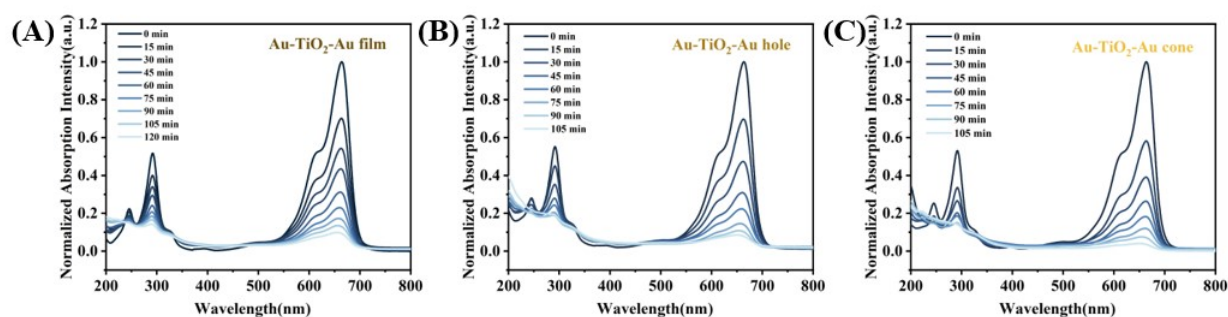

**Figure S5.** Normalized UV absorption spectra of Methylene Blue (MB) at different light exposure times of (A) Au-TiO<sub>2</sub>-Au film, (B) Au-TiO<sub>2</sub>-Au hole, (C) Au-TiO<sub>2</sub>-Au cone.

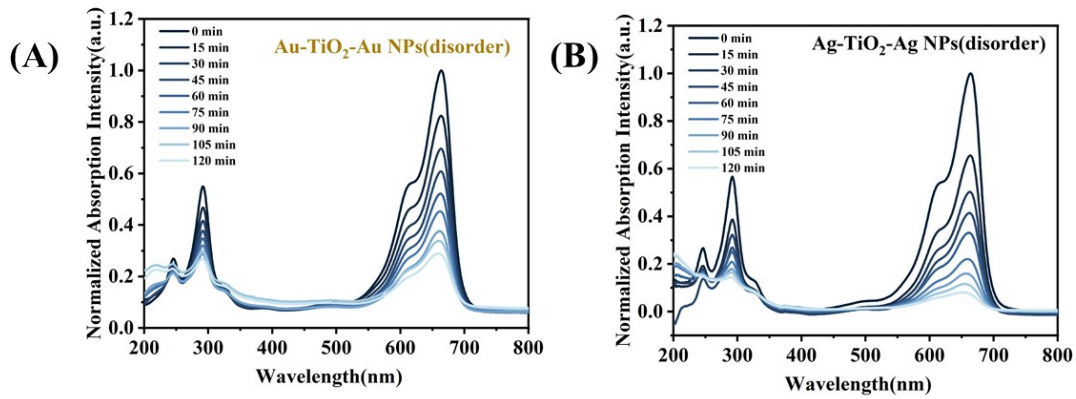

**Figure S6.** Normalized UV absorption spectra of Methylene Blue (MB) at different light exposure times of (A) Au-TiO<sub>2</sub>-disorder Au NPs and (B) Ag-TiO<sub>2</sub>-disorder Ag NPs.

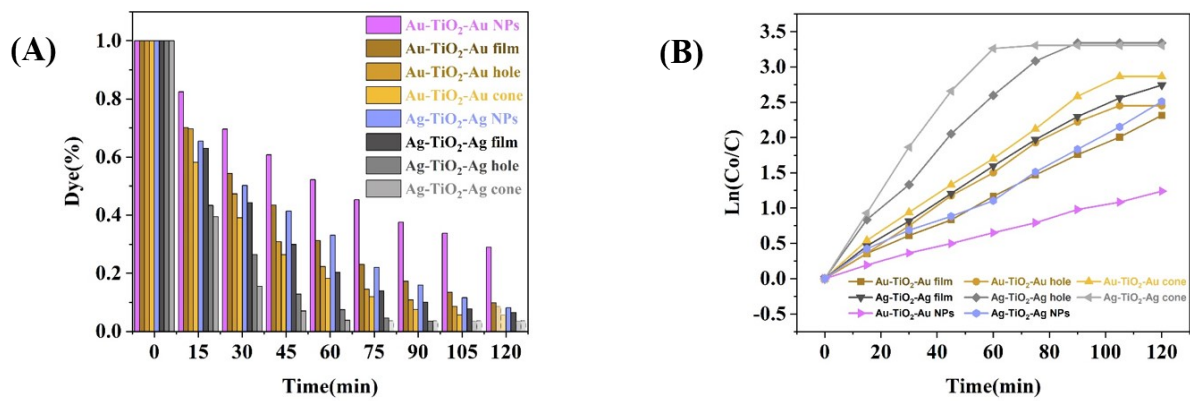

**Figure S7.** (A) Degradation Efficiency of MB with Different Structures, (B) Comparison of Reaction Rates for Different Structures.

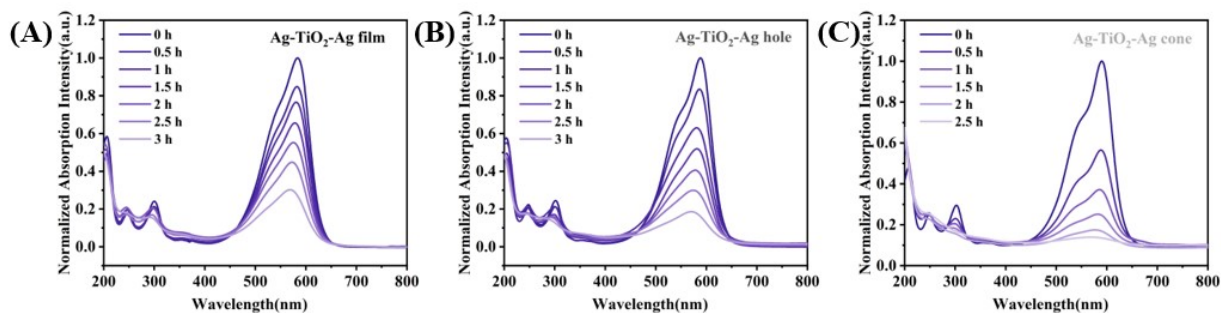

**Figure S8.** Normalized UV absorption spectra of Crystal violet (CV) at different light exposure times of (A) Ag-TiO<sub>2</sub>-Ag film, (B) Ag-TiO<sub>2</sub>-Ag hole, (C) Ag-TiO<sub>2</sub>-Ag cone.

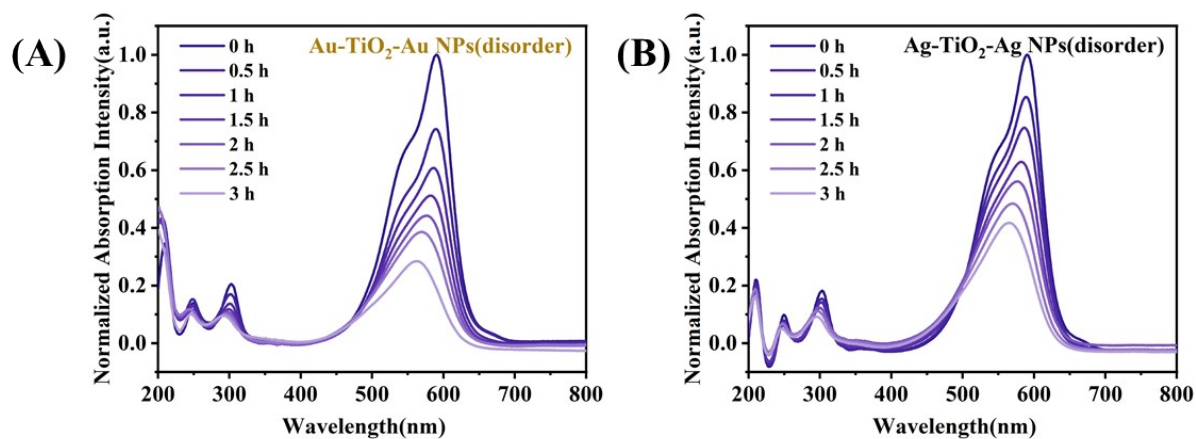

**Figure S9.** Normalized UV absorption spectra of Crystal violet (CV) at different light exposure times of (A) Au-TiO<sub>2</sub>-disorder Au NPs and (B) Ag-TiO<sub>2</sub>-disorder Ag NPs.

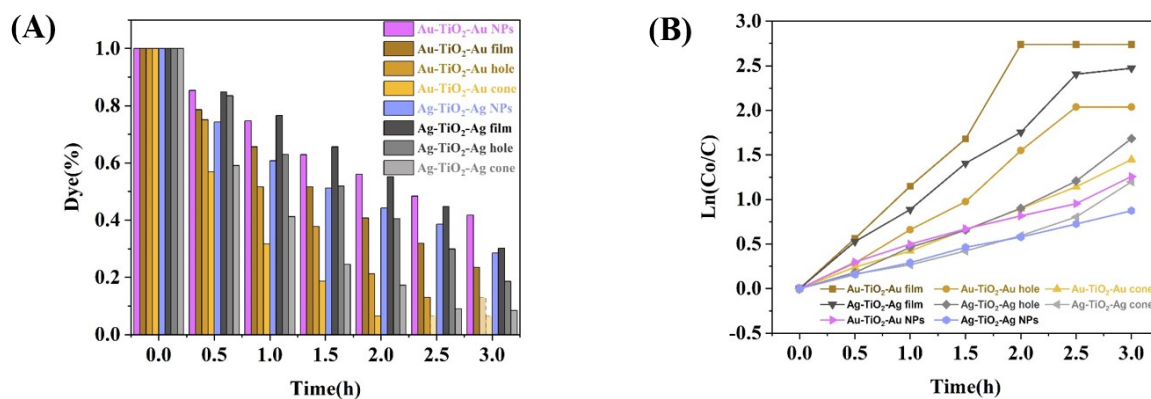

**Figure S10.** (A) Degradation Efficiency of CV with Different Structures, (B) Comparison of Reaction Rates for Different Structures.

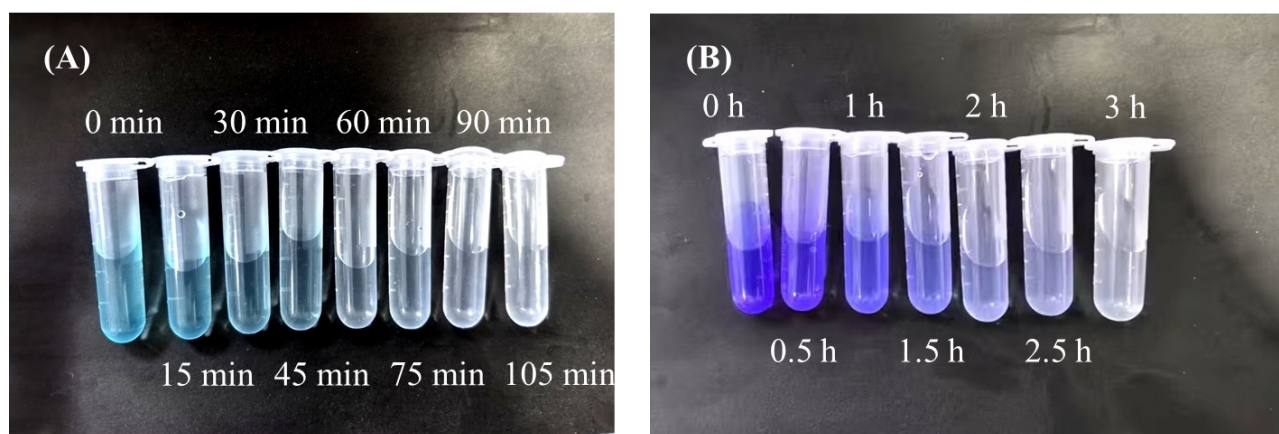

**Figure S11.** Photograph showing the degradation of organic dyes under xenon lamp irradiation with different times of (A) MB and (B) CV.

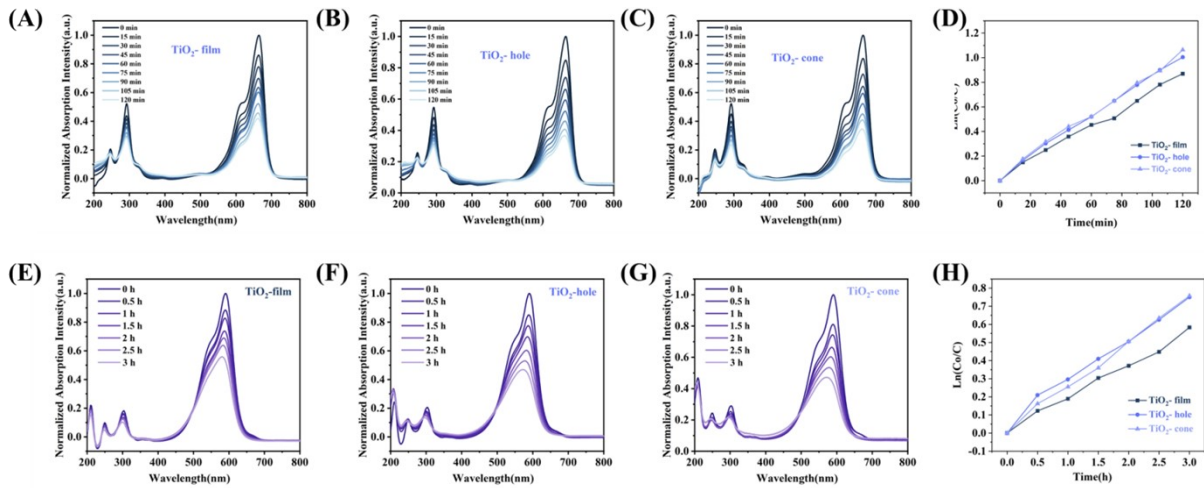

**Figure S12.** Normalized UV absorption spectra of MB at different light exposure times of (A) Ag+TiO<sub>2</sub>+Ag film, (B) Ag+TiO<sub>2</sub>+Ag hole, (C) Ag+TiO<sub>2</sub>+Ag cone. Normalized UV absorption spectra of CV at different light exposure times of (E) TiO<sub>2</sub> film, (F) TiO<sub>2</sub> hole, (G) TiO<sub>2</sub> cone. Comparison of Reaction Rates for Different Structures (D) of MB and (H) of CV.

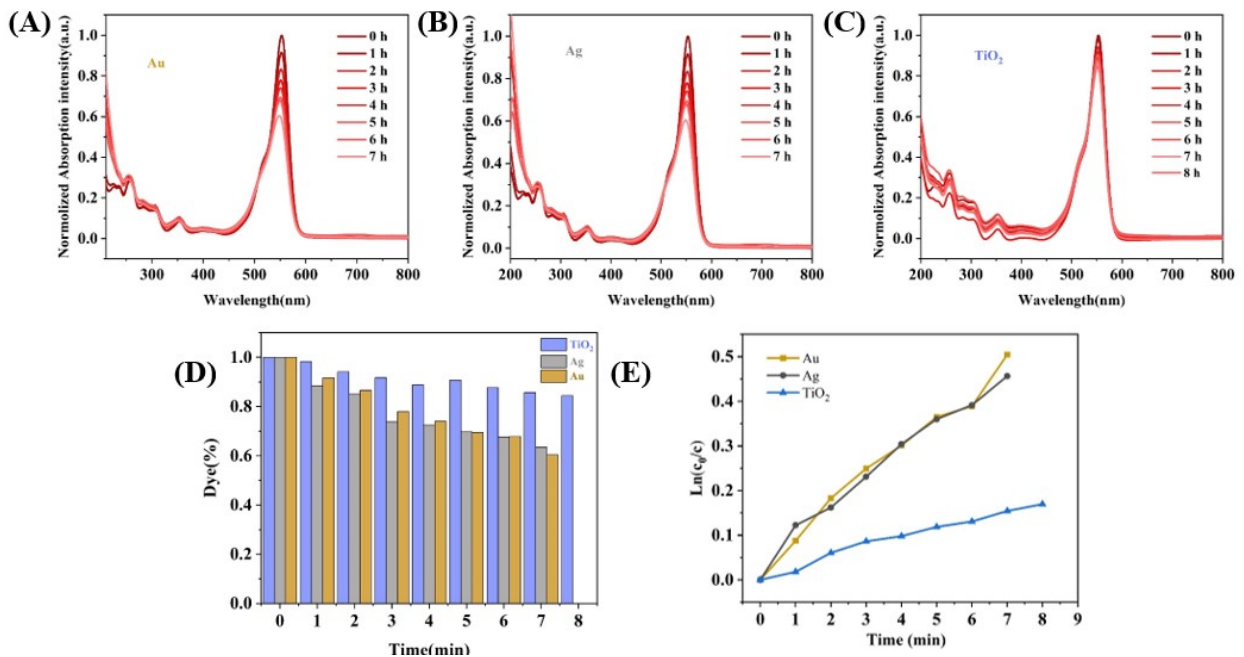

**Figure S13.** Normalized UV absorption spectra of RhB at different light exposure times of (A) TiO<sub>2</sub>, (B) Ag, (C) Au. (D) Degradation efficiency of RhB with different structures. (E) Comparison of reaction rates for different structures.

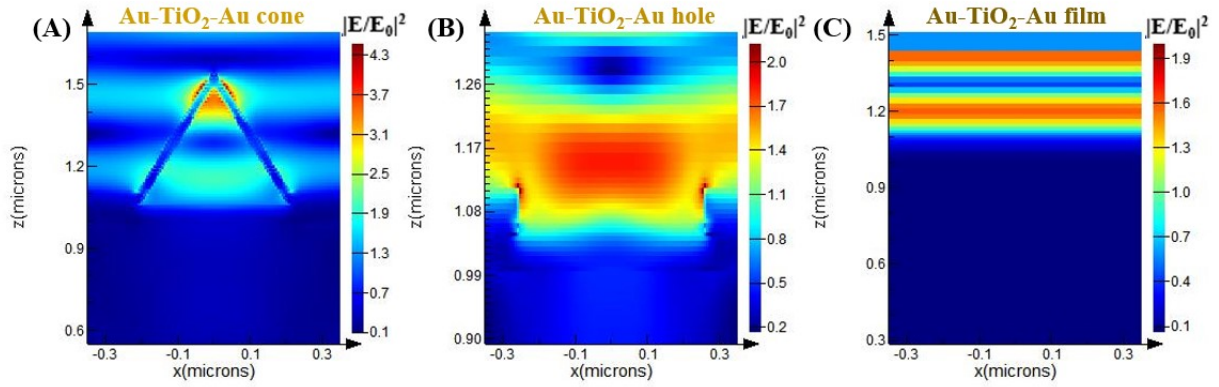

**Figure S14.** FDTD of Electromagnetic field simulation at 400 nm of (A) Au–TiO<sub>2</sub>–Au cone, (B) Au–TiO<sub>2</sub>–Au hole, (C) Au–TiO<sub>2</sub>–Au film.

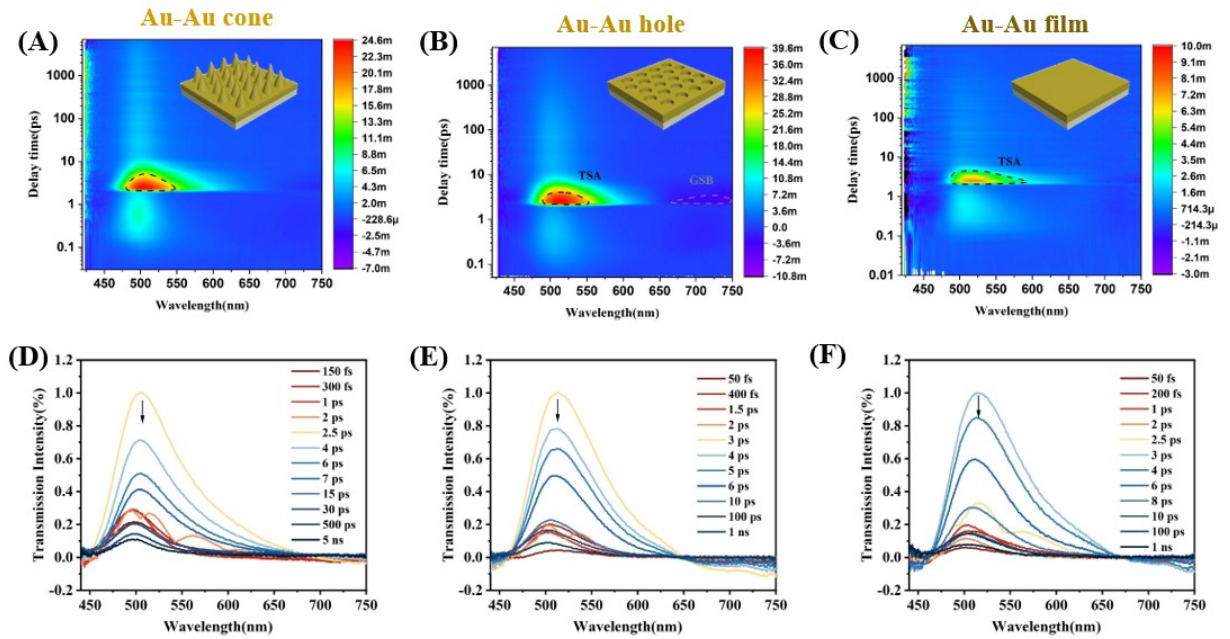

**Figure S15.** Contour plot of fs-TA spectra of (A) Au–Au cone, (B) Au–Au hole and (C) Au–Au film. TA spectra of (D) Au–Au cone, (E) Au–Au hole and (F) Au–Au film.

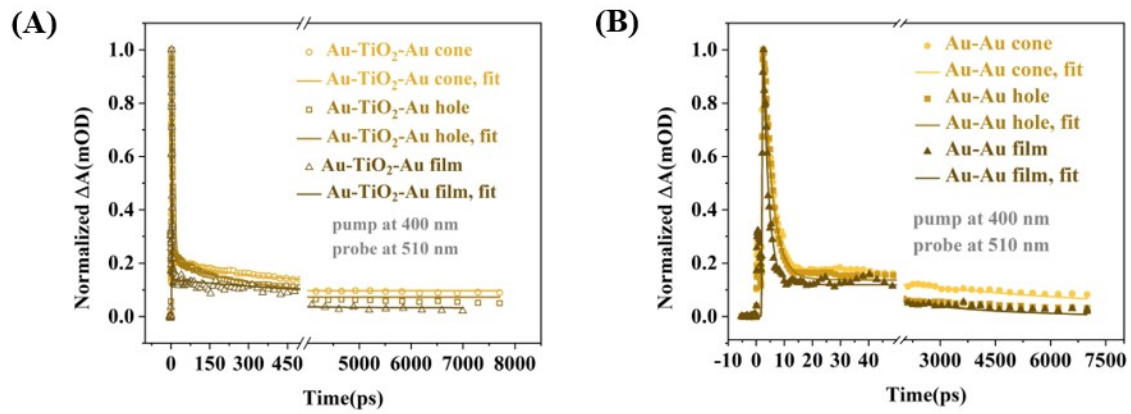

**Figure S16.** Single-wavelength dynamics of (A) comparison of three heterostructures containing TiO<sub>2</sub> and (B) comparison of three nanostructures without TiO<sub>2</sub>. The solid curves are fitting plots.

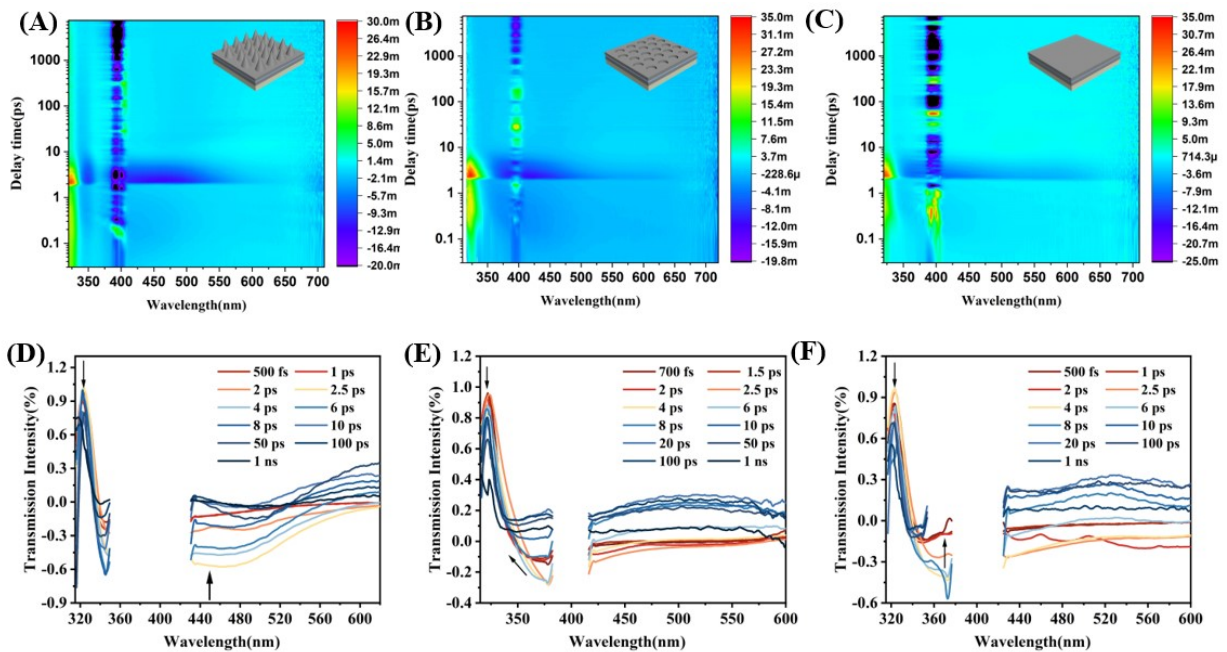

**Figure S17.** Contour plot of fs-TA spectra of (A) Ag-TiO<sub>2</sub>-Ag cone, (B) Ag-TiO<sub>2</sub>-Ag hole and (C) Ag-TiO<sub>2</sub>-Ag film. TA spectra of (D) Ag-TiO<sub>2</sub>-Ag cone, (E) Ag-TiO<sub>2</sub>-Ag hole and (F) Ag-TiO<sub>2</sub>-Ag film. The spectral discontinuity results from subtracting the 400 nm pump light.

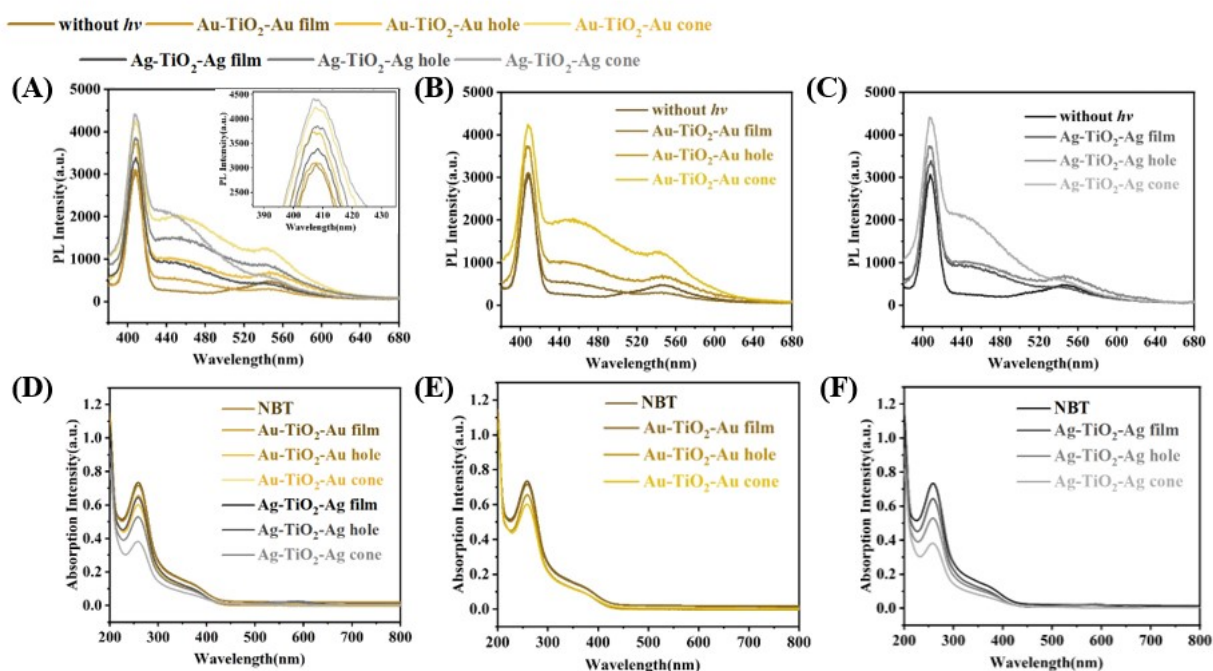

**Figure S18.** (A-C) Quantitative testing of hydroxyl radicals: fluorescence spectra of six heterogeneous structures after 30-minute irradiation in disodium terephthalate solution. (D-F) Quantitative testing of superoxide radicals: UV-Vis absorption spectra of six heterogeneous structures after 30-minute irradiation in NBT solution.

**Table R1.** Au-TiO<sub>2</sub>-Au peak table after charge correction

| Name  | Peak BE | Height    | CPS FWHM eV | Area (P)<br>CPS.eV | Area (N) TPP-<br>2M | Atomic % |
|-------|---------|-----------|-------------|--------------------|---------------------|----------|
| C 1s  | 284.80  | 15456.02  | 1.41        | 28269.26           | 0.36                | 38.59    |
| O 1s  | 531.40  | 10065.25  | 2.77        | 29403.95           | 0.14                | 15.16    |
| Ti 2p | 459.55  | 8475.53   | 1.11        | 21353.33           | 0.04                | 4.77     |
| Au 4f | 83.53   | 349961.94 | 0.86        | 664314.09          | 0.38                | 41.48    |

**Table R2.** Ag-TiO<sub>2</sub>-Ag peak table after charge correction

| Name | Peak BE | Height   | CPS FWHM eV | Area (P)<br>CPS.eV | Area (N) TPP-<br>2M | Atomic % |
|------|---------|----------|-------------|--------------------|---------------------|----------|
| C 1s | 284.80  | 32915.85 | 1.13        | 46641.32           | 0.59                | 52.8     |
| O 1s | 530.78  | 14721.31 | 1.5         | 30751.43           | 0.15                | 13.15    |

|       |        |           |      |           |      |       |
|-------|--------|-----------|------|-----------|------|-------|
| Ti 2p | 458.96 | 6884.31   | 1.22 | 16588.71  | 0.03 | 3.07  |
| Ag 3d | 368.35 | 342653.49 | 0.82 | 590113.67 | 0.35 | 30.98 |

**Table S3.** Degradation performance comparison between the photocatalyst reported in this work and various reference photocatalysts.

|          | <b>Photocatalysts</b>                                   | <b>Light source</b>                           | <b>Pollutant concentration</b>       | <b>Reaction time</b> | <b>References</b> |
|----------|---------------------------------------------------------|-----------------------------------------------|--------------------------------------|----------------------|-------------------|
| <b>1</b> | Ag-TiO <sub>2</sub> disordered particles                | 300 W Xe lamps (VIS light)                    | MB (10 mg L <sup>-1</sup> )          | 150 min              | [51]              |
| <b>2</b> | TiO <sub>2</sub> NPs/Ag NWs                             | Xe solar simulator (100 mW cm <sup>-2</sup> ) | MB (0.05 mM)                         | 150 min              | [52]              |
| <b>3</b> | AAO+TiO <sub>2</sub> film +Ag NPs                       | Laser irradiation (355 nm)                    | MB (6×10 <sup>-4</sup> M)            | 180 min              | [53]              |
| <b>4</b> | Au+WO <sub>3</sub> @TiO <sub>2</sub> Triple-core-shell  | 300 W Xe lamp                                 | MB (30 ppm)                          | 240min               | [54]              |
| <b>5</b> | Ag NPs-TiO <sub>2</sub> NRs nanorods                    | Natural sunlight                              | MB (10 μM)                           | 60 min               | [55]              |
| <b>6</b> | SiO <sub>2</sub> /Ag/SiO <sub>2</sub> /TiO <sub>2</sub> | 150 W Xe lamp (λ > 400 nm)                    | MB (10 <sup>-5</sup> M)              | 175 min              | [56]              |
| <b>7</b> | Ag NPs-TiO <sub>2</sub> /WO <sub>3</sub> Nanotube film  | 200 W Xe lamp                                 | MB (2 mg L <sup>-1</sup> )           | 120 min              | [57]              |
| <b>8</b> | <b>This work</b>                                        | <b>300 W Xe lamp</b>                          | <b>MB CV RhB (10<sup>-5</sup> M)</b> | <b>75min</b>         | -                 |
